# Supplementary material for: Genetic markers of rheumatoid arthritis susceptibility in anti-citrullinated peptide antibody negative patients
Source: PubMed Central journal article supplement — Ann Rheum Dis. 2012 Jun 1;71(12):1984–90. doi: 10.1136/annrheumdis-2011-201225 (PMC3595982; doi:10.1136/annrheumdis-2011-201225), 2012-06-01
Supplement: annrheumdis-2011-201225-s1.pdf [file annrheumdis-2011-201225-s1.pdf]

| Cohort             | NOAR        | UKRAG       | BRAGGS      | NR          |
|--------------------|-------------|-------------|-------------|-------------|
| Disease            | 1987 ACR RA | 1987 ACR RA | 1987 ACR RA | 1987 ACR RA |
| Total N patients   | 1741        | 866         | 2912        | 589         |
| % female           | 68          | 65          | 74          | 80          |
| Age (IQR)          | 56 (46;67)  | 57 (49;67)  | 47 (36;56)  | 37 (29;46)  |
| N CCPneg           | 1004        | 313         | 612         | 111         |
| N CCPpos           | 737         | 553         | 2300        | 478         |
| % CCP pos          | 42          | 64          | 79          | 81          |
| % RF pos           | 61          | 65          | 76          | 85          |
| % erosive patients | 59          | 52          | 55          | 81          |

**Supplementary table 1:** Summary of cohort characteristics.

NOAR: Norfolk Arthritis Register. UKRAG: UK RA Genetics Consortium. BRAGGS: Biologics in RA Genetics and Genomics Study Syndicate. NR: National Repository. 1987 ACR RA: satisfying the 1987 ACR classification criteria for rheumatoid arthritis. Age: median patient age at disease onset, with interquartile range (IQR). N: number. RF: rheumatoid factor. For samples tested at several occasions over time, the RF or anti-CCP status was defined as positive if at least one of the tests was positive (“ever positivity”). Disease duration at the time of the last x-ray differs between patients and cohorts. The fact that disease severity and therefore the percentage of anti-CCP positive patients differs between cohorts does not represent a limitation in a case control study of susceptibility markers.

|          | Shared epitope |                    |          | PTPN22 |                     |         |
|----------|----------------|--------------------|----------|--------|---------------------|---------|
|          | N pat          | OR (95% CI)        | p-value  | N pat  | OR (95% CI)         | p-value |
| Control  | 1352           | -                  | -        | 12398  | -                   | -       |
| CCP- RF- | 709            | 1.17 (1.01 ; 1.34) | 0.034    | 1042   | 1.21 (1.05 ; 1.39 ) | 0.008   |
| CCP- RF+ | 586            | 1.39 (1.20 ; 1.61) | 1.0E-05  | 774    | 1.20 (1.02 ; 1.41)  | 0.032   |
| CCP+ RF- | 169            | 3.30 (2.61 ; 4.19) | 3.6E-23  | 511    | 2.00 (1.69 ; 2.36)  | 5.1E-16 |
| CCP+ RF+ | 2175           | 4.16 (3.70 ; 4.68) | 5.8E-124 | 3107   | 1.87 (1.73 ; 2.03)  | 3.1E-53 |

**Supplementary table 2:** Stratified analysis by serotypes based on two auto-antibodies

CCP: anti-CCP. RF: rheumatoid factor. For samples tested at several occasions over time, the RF or anti-CCP status was defined as positive if at least one of the tests was positive (“ever positivity”). N pat: number of patients. CI: confidence interval.
